# Supplementary material
Source: publisher figshare collection journal article supplement (https://acs.figshare.com/ndownloader/files/5139520)
Supplement: Supplementary file 1 [file 5139520]

 
data_MOF-71

_publ_requested_journal             'J. Am. Chem. Soc.'

_publ_section_title
;
   Rod Packings and Metal-Organic Frameworks Constructed From 
Rod-Shaped Secondary Building Units

;

_publ_contact_author          
;
Omar M. Yaghi
Department of Chemistry
University of Michigan
930 N. University Ave.
Ann Arbor, MI 48109-1055, USA
;
_publ_contact_author_email     oyaghi@umich.edu

loop_
_publ_author_name
_publ_author_address
'Nathaniel L. Rosi'
;  Department of Chemistry
University of Michigan
930 N. University Ave.
Ann Arbor, MI 48109-1055, USA
;
'Jaheon Kim'
; Department of Chemistry
University of Michigan
930 N. University Ave.
Ann Arbor, MI 48109-1055, USA

;

'Mohamed Eddaoudi'
; Department of Chemistry
University of Michigan
930 N. University Ave.
Ann Arbor, MI 48109-1055, USA

;

'Michael O'Keeffe'
; Department of Chemistry and Biochemistry
Arizona State University
Tempe, AZ  85287-1604  USA
;
 
_audit_creation_method            SHELXL-97 
_chemical_name_systematic 
; 
 ? 
; 
_chemical_name_common             ? 
_chemical_melting_point           ? 
_chemical_formula_moiety          'C2.75 H Co0.25 N0.25 O1.25' 
_chemical_formula_sum             'C2.75 H Co0.25 N0.25 O1.25'
  
_chemical_formula_weight          72.27 
 
loop_ 
 _atom_type_symbol 
 _atom_type_description 
 _atom_type_scat_dispersion_real 
 _atom_type_scat_dispersion_imag 
 _atom_type_scat_source 
 'C'  'C'   0.0033   0.0016 
 'International Tables Vol C Tables 4.2.6.8 and 6.1.1.4' 
 'H'  'H'   0.0000   0.0000 
 'International Tables Vol C Tables 4.2.6.8 and 6.1.1.4' 
 'N'  'N'   0.0061   0.0033 
 'International Tables Vol C Tables 4.2.6.8 and 6.1.1.4' 
 'O'  'O'   0.0106   0.0060 
 'International Tables Vol C Tables 4.2.6.8 and 6.1.1.4' 
 'Co'  'Co'   0.3494   0.9721 
 'International Tables Vol C Tables 4.2.6.8 and 6.1.1.4' 
 
_symmetry_cell_setting            orthorhombic 
_symmetry_space_group_name_H-M    'I m m a' 
_symmetry_space_group_name_Hall   '-I 2b 2' 
 
loop_ 
 _symmetry_equiv_pos_as_xyz 
 'x, y, z' 
 '-x, -y+1/2, z' 
 '-x, y+1/2, -z' 
 'x, -y, -z' 
 'x+1/2, y+1/2, z+1/2' 
 '-x+1/2, -y+1, z+1/2' 
 '-x+1/2, y+1, -z+1/2' 
 'x+1/2, -y+1/2, -z+1/2' 
 '-x, -y, -z' 
 'x, y-1/2, -z' 
 'x, -y-1/2, z' 
 '-x, y, z' 
 '-x+1/2, -y+1/2, -z+1/2' 
 'x+1/2, y, -z+1/2' 
 'x+1/2, -y, z+1/2' 
 '-x+1/2, y+1/2, z+1/2' 
 
_cell_length_a                    19.2301(16) 
_cell_length_b                    7.2386(6) 
_cell_length_c                    8.8481(7) 
_cell_angle_alpha                 90.00 
_cell_angle_beta                  90.00 
_cell_angle_gamma                 90.00 
_cell_volume                      1231.65(17) 
_cell_formula_units_Z             16 
_cell_measurement_temperature     298(2) 
_cell_measurement_reflns_used     ? 
_cell_measurement_theta_min       ? 
_cell_measurement_theta_max       ? 
 
_exptl_crystal_description        block 
_exptl_crystal_colour             pink 
_exptl_crystal_size_max           0.20 
_exptl_crystal_size_mid           0.16 
_exptl_crystal_size_min           0.10 
_exptl_crystal_density_meas       ? 
_exptl_crystal_density_diffrn     1.559 
_exptl_crystal_density_method     'not measured' 
_exptl_crystal_F_000              576 
_exptl_absorpt_coefficient_mu     1.403 
_exptl_absorpt_correction_type    none 
_exptl_absorpt_correction_T_min   ? 
_exptl_absorpt_correction_T_max   ? 
_exptl_absorpt_process_details    ? 
 
_exptl_special_details 
; 
 ? 
; 
 
_diffrn_ambient_temperature       298(2) 
_diffrn_radiation_wavelength      0.71073 
_diffrn_radiation_type            MoK\a 
_diffrn_radiation_source          'fine-focus sealed tube' 
_diffrn_radiation_monochromator   graphite 
_diffrn_measurement_device_type   'Bruker SAMRT APEX' 
_diffrn_measurement_method        'omega scan' 
_diffrn_detector_area_resol_mean  ? 
_diffrn_standards_number          ? 
_diffrn_standards_interval_count  ? 
_diffrn_standards_interval_time   ? 
_diffrn_standards_decay_%         none 
_diffrn_reflns_number             3572 
_diffrn_reflns_av_R_equivalents   0.0611 
_diffrn_reflns_av_sigmaI/netI     0.0340 
_diffrn_reflns_limit_h_min        -21 
_diffrn_reflns_limit_h_max        24 
_diffrn_reflns_limit_k_min        -9 
_diffrn_reflns_limit_k_max        9 
_diffrn_reflns_limit_l_min        -11 
_diffrn_reflns_limit_l_max        10 
_diffrn_reflns_theta_min          2.12 
_diffrn_reflns_theta_max          27.53 
_reflns_number_total              792 
_reflns_number_gt                 697 
_reflns_threshold_expression      >2sigma(I) 
 
_computing_data_collection        'Bruker SMART' 
_computing_cell_refinement        'Bruker SMART' 
_computing_data_reduction         'Bruker SAINT' 
_computing_structure_solution     'SHELXS-97 (Sheldrick, 1990)' 
_computing_structure_refinement   'SHELXL-97 (Sheldrick, 1997)' 
_computing_molecular_graphics     'Bruker XP' 
_computing_publication_material   'Bruker XCIF' 
 
_refine_special_details 
; 
 Refinement of F^2^ against ALL reflections.  The weighted R-factor wR and 
 goodness of fit S are based on F^2^, conventional R-factors R are based 
 on F, with F set to zero for negative F^2^. The threshold expression of 
 F^2^ > 2sigma(F^2^) is used only for calculating R-factors(gt) etc. and is 
 not relevant to the choice of reflections for refinement.  R-factors based 
 on F^2^ are statistically about twice as large as those based on F, and R- 
 factors based on ALL data will be even larger. 
; 
 
_refine_ls_structure_factor_coef  Fsqd  
_refine_ls_matrix_type            full 
_refine_ls_weighting_scheme       calc  
_refine_ls_weighting_details 
 'calc w=1/[\s^2^(Fo^2^)+(0.0617P)^2^+0.0000P] where P=(Fo^2^+2Fc^2^)/3' 
_atom_sites_solution_primary      direct 
_atom_sites_solution_secondary    difmap 
_atom_sites_solution_hydrogens    geom 
_refine_ls_hydrogen_treatment     mixed 
_refine_ls_extinction_method      SHELXL 
_refine_ls_extinction_coef        none 
_refine_ls_extinction_expression 
 'Fc^*^=kFc[1+0.001xFc^2^\l^3^/sin(2\q)]^-1/4^' 
_refine_ls_number_reflns          792 
_refine_ls_number_parameters      62 
_refine_ls_number_restraints      0 
_refine_ls_R_factor_all           0.0364 
_refine_ls_R_factor_gt            0.0329 
_refine_ls_wR_factor_ref          0.0896 
_refine_ls_wR_factor_gt           0.0877 
_refine_ls_goodness_of_fit_ref    1.105 
_refine_ls_restrained_S_all       1.105 
_refine_ls_shift/su_max           3.083 
_refine_ls_shift/su_mean          0.050 
 
loop_ 
 _atom_site_label 
 _atom_site_type_symbol 
 _atom_site_fract_x 
 _atom_site_fract_y 
 _atom_site_fract_z 
 _atom_site_U_iso_or_equiv 
 _atom_site_adp_type 
 _atom_site_occupancy 
 _atom_site_symmetry_multiplicity 
 _atom_site_calc_flag 
 _atom_site_refinement_flags 
 _atom_site_disorder_assembly 
 _atom_site_disorder_group 
Co1 Co 0.5000 0.0000 0.5000 0.0168(2) Uani 1 4 d S . . 
O1 O 0.42216(6) 0.09615(16) 0.63525(15) 0.0358(4) Uani 1 1 d . . . 
O2 O 0.5000 0.2500 0.3625(3) 0.0283(5) Uani 1 4 d S . . 
C1 C 0.39424(12) 0.2500 0.6526(3) 0.0267(5) Uani 1 2 d S . . 
C2 C 0.31931(12) 0.2500 0.7037(3) 0.0301(6) Uani 1 2 d S . . 
C3 C 0.28412(9) 0.0862(3) 0.7262(3) 0.0534(7) Uani 1 1 d . . . 
H3 H 0.3067 -0.0255 0.7091 0.064 Uiso 1 1 calc R . . 
N1 N 0.5000 0.2500 0.1073(4) 0.0532(11) Uani 1 4 d S . . 
C4 C 0.4739(3) 0.2500 0.2366(6) 0.0358(12) Uani 0.50 2 d SP . . 
C5 C 0.4170(5) 0.2500 0.1031(9) 0.070(2) Uani 0.50 2 d SP . . 
C6 C 0.4685(6) 0.2500 -0.0371(9) 0.082(4) Uani 0.50 2 d SP . . 
 
loop_ 
 _atom_site_aniso_label 
 _atom_site_aniso_U_11 
 _atom_site_aniso_U_22 
 _atom_site_aniso_U_33 
 _atom_site_aniso_U_23 
 _atom_site_aniso_U_13 
 _atom_site_aniso_U_12 
Co1 0.0122(3) 0.0150(3) 0.0233(3) -0.00094(13) 0.000 0.000 
O1 0.0266(6) 0.0267(7) 0.0540(8) 0.0002(6) 0.0200(5) 0.0036(5) 
O2 0.0455(14) 0.0161(11) 0.0232(11) 0.000 0.000 0.000 
C1 0.0201(10) 0.0261(12) 0.0337(12) 0.000 0.0104(9) 0.000 
C2 0.0226(11) 0.0247(12) 0.0431(14) 0.000 0.0153(10) 0.000 
C3 0.0307(11) 0.0217(10) 0.1077(19) -0.0036(11) 0.0294(11) 0.0033(7) 
N1 0.106(4) 0.0272(17) 0.0266(17) 0.000 0.000 0.000 
C4 0.054(3) 0.017(2) 0.036(3) 0.000 -0.008(2) 0.000 
C5 0.077(6) 0.075(5) 0.058(4) 0.000 -0.029(4) 0.000 
C6 0.156(12) 0.056(5) 0.034(3) 0.000 -0.019(5) 0.000 
 
_geom_special_details 
; 
 All esds (except the esd in the dihedral angle between two l.s. planes) 
 are estimated using the full covariance matrix.  The cell esds are taken 
 into account individually in the estimation of esds in distances, angles 
 and torsion angles; correlations between esds in cell parameters are only 
 used when they are defined by crystal symmetry.  An approximate (isotropic) 
 treatment of cell esds is used for estimating esds involving l.s. planes. 
; 
 
loop_ 
 _geom_bond_atom_site_label_1 
 _geom_bond_atom_site_label_2 
 _geom_bond_distance 
 _geom_bond_site_symmetry_2 
 _geom_bond_publ_flag 
Co1 O1 2.0389(11) 12_655 ? 
Co1 O1 2.0389(11) 4_556 ? 
Co1 O1 2.0389(11) . ? 
Co1 O1 2.0389(11) 9_656 ? 
Co1 O2 2.1806(12) 9_656 ? 
Co1 O2 2.1806(12) . ? 
O1 C1 1.2458(15) . ? 
O2 C4 1.222(6) . ? 
O2 C4 1.222(6) 2_655 ? 
O2 Co1 2.1806(12) 2_655 ? 
C1 O1 1.2458(15) 11_565 ? 
C1 C2 1.510(3) . ? 
C2 C3 1.380(2) . ? 
C2 C3 1.380(2) 11_565 ? 
C3 C3 1.378(3) 7_546 ? 
C3 H3 0.9300 . ? 
N1 C4 1.250(7) . ? 
N1 C4 1.250(7) 2_655 ? 
N1 C6 1.414(9) . ? 
N1 C6 1.414(9) 2_655 ? 
N1 C5 1.597(9) . ? 
N1 C5 1.597(9) 2_655 ? 
C4 C4 1.005(11) 2_655 ? 
C4 C5 1.610(9) . ? 
C5 C6 1.588(15) . ? 
C6 C6 1.21(2) 2_655 ? 
 
loop_ 
 _geom_angle_atom_site_label_1 
 _geom_angle_atom_site_label_2 
 _geom_angle_atom_site_label_3 
 _geom_angle 
 _geom_angle_site_symmetry_1 
 _geom_angle_site_symmetry_3 
 _geom_angle_publ_flag 
O1 Co1 O1 180.00(4) 12_655 4_556 ? 
O1 Co1 O1 94.47(8) 12_655 . ? 
O1 Co1 O1 85.53(8) 4_556 . ? 
O1 Co1 O1 85.53(8) 12_655 9_656 ? 
O1 Co1 O1 94.47(8) 4_556 9_656 ? 
O1 Co1 O1 180.0 . 9_656 ? 
O1 Co1 O2 87.47(5) 12_655 9_656 ? 
O1 Co1 O2 92.53(5) 4_556 9_656 ? 
O1 Co1 O2 87.47(5) . 9_656 ? 
O1 Co1 O2 92.53(5) 9_656 9_656 ? 
O1 Co1 O2 92.53(5) 12_655 . ? 
O1 Co1 O2 87.47(5) 4_556 . ? 
O1 Co1 O2 92.53(5) . . ? 
O1 Co1 O2 87.47(5) 9_656 . ? 
O2 Co1 O2 180.0 9_656 . ? 
C1 O1 Co1 133.93(12) . . ? 
C4 O2 C4 48.6(6) . 2_655 ? 
C4 O2 Co1 120.57(8) . 2_655 ? 
C4 O2 Co1 120.57(8) 2_655 2_655 ? 
C4 O2 Co1 120.57(8) . . ? 
C4 O2 Co1 120.57(8) 2_655 . ? 
Co1 O2 Co1 112.18(10) 2_655 . ? 
O1 C1 O1 126.8(2) 11_565 . ? 
O1 C1 C2 116.61(10) 11_565 . ? 
O1 C1 C2 116.61(10) . . ? 
C3 C2 C3 118.5(2) . 11_565 ? 
C3 C2 C1 120.75(11) . . ? 
C3 C2 C1 120.75(11) 11_565 . ? 
C3 C3 C2 120.74(11) 7_546 . ? 
C3 C3 H3 119.6 7_546 . ? 
C2 C3 H3 119.6 . . ? 
C4 N1 C4 47.4(5) . 2_655 ? 
C4 N1 C6 130.9(5) . . ? 
C4 N1 C6 178.4(6) 2_655 . ? 
C4 N1 C6 178.4(6) . 2_655 ? 
C4 N1 C6 130.9(5) 2_655 2_655 ? 
C6 N1 C6 50.7(10) . 2_655 ? 
C4 N1 C5 67.6(4) . . ? 
C4 N1 C5 115.0(4) 2_655 . ? 
C6 N1 C5 63.3(6) . . ? 
C6 N1 C5 114.0(5) 2_655 . ? 
C4 N1 C5 115.0(4) . 2_655 ? 
C4 N1 C5 67.6(4) 2_655 2_655 ? 
C6 N1 C5 114.0(5) . 2_655 ? 
C6 N1 C5 63.3(6) 2_655 2_655 ? 
C5 N1 C5 177.4(7) . 2_655 ? 
C4 C4 O2 65.7(3) 2_655 . ? 
C4 C4 N1 66.3(3) 2_655 . ? 
O2 C4 N1 132.0(5) . . ? 
C4 C4 C5 132.8(4) 2_655 . ? 
O2 C4 C5 161.5(6) . . ? 
N1 C4 C5 66.5(4) . . ? 
C6 C5 N1 52.7(6) . . ? 
C6 C5 C4 98.6(7) . . ? 
N1 C5 C4 45.9(3) . . ? 
C6 C6 N1 64.6(5) 2_655 . ? 
C6 C6 C5 128.6(5) 2_655 . ? 
N1 C6 C5 64.0(4) . . ? 
 
loop_ 
 _geom_torsion_atom_site_label_1 
 _geom_torsion_atom_site_label_2 
 _geom_torsion_atom_site_label_3 
 _geom_torsion_atom_site_label_4 
 _geom_torsion 
 _geom_torsion_site_symmetry_1 
 _geom_torsion_site_symmetry_2 
 _geom_torsion_site_symmetry_3 
 _geom_torsion_site_symmetry_4 
 _geom_torsion_publ_flag 
O1 Co1 O1 C1 80.8(2) 12_655 . . . ? 
O1 Co1 O1 C1 -99.2(2) 4_556 . . . ? 
O2 Co1 O1 C1 168.0(2) 9_656 . . . ? 
O2 Co1 O1 C1 -12.0(2) . . . . ? 
O1 Co1 O2 C4 161.2(3) 12_655 . . . ? 
O1 Co1 O2 C4 -18.8(3) 4_556 . . . ? 
O1 Co1 O2 C4 -104.2(3) . . . . ? 
O1 Co1 O2 C4 75.8(3) 9_656 . . . ? 
O1 Co1 O2 C4 104.2(3) 12_655 . . 2_655 ? 
O1 Co1 O2 C4 -75.8(3) 4_556 . . 2_655 ? 
O1 Co1 O2 C4 -161.2(3) . . . 2_655 ? 
O1 Co1 O2 C4 18.8(3) 9_656 . . 2_655 ? 
O1 Co1 O2 Co1 -47.30(4) 12_655 . . 2_655 ? 
O1 Co1 O2 Co1 132.70(4) 4_556 . . 2_655 ? 
O1 Co1 O2 Co1 47.30(4) . . . 2_655 ? 
O1 Co1 O2 Co1 -132.70(4) 9_656 . . 2_655 ? 
Co1 O1 C1 O1 -30.2(4) . . . 11_565 ? 
Co1 O1 C1 C2 151.42(17) . . . . ? 
O1 C1 C2 C3 -179.9(3) 11_565 . . . ? 
O1 C1 C2 C3 -1.3(4) . . . . ? 
O1 C1 C2 C3 1.3(4) 11_565 . . 11_565 ? 
O1 C1 C2 C3 179.9(3) . . . 11_565 ? 
C3 C2 C3 C3 -1.6(6) 11_565 . . 7_546 ? 
C1 C2 C3 C3 179.6(3) . . . 7_546 ? 
Co1 O2 C4 C4 105.46(16) 2_655 . . 2_655 ? 
Co1 O2 C4 C4 -105.46(16) . . . 2_655 ? 
C4 O2 C4 N1 0.0 2_655 . . . ? 
Co1 O2 C4 N1 105.46(16) 2_655 . . . ? 
Co1 O2 C4 N1 -105.46(17) . . . . ? 
C4 O2 C4 C5 180.000(1) 2_655 . . . ? 
Co1 O2 C4 C5 -74.54(17) 2_655 . . . ? 
Co1 O2 C4 C5 74.54(16) . . . . ? 
C6 N1 C4 C4 180.0 . . . 2_655 ? 
C5 N1 C4 C4 180.0 . . . 2_655 ? 
C5 N1 C4 C4 0.0 2_655 . . 2_655 ? 
C4 N1 C4 O2 0.0 2_655 . . . ? 
C6 N1 C4 O2 180.0 . . . . ? 
C5 N1 C4 O2 180.0 . . . . ? 
C5 N1 C4 O2 0.0 2_655 . . . ? 
C4 N1 C4 C5 180.0 2_655 . . . ? 
C6 N1 C4 C5 0.0 . . . . ? 
C5 N1 C4 C5 180.0 2_655 . . . ? 
C4 N1 C5 C6 180.0 . . . . ? 
C4 N1 C5 C6 180.0 2_655 . . . ? 
C6 N1 C5 C6 0.0 2_655 . . . ? 
C4 N1 C5 C4 0.0 2_655 . . . ? 
C6 N1 C5 C4 180.0 . . . . ? 
C6 N1 C5 C4 180.0 2_655 . . . ? 
C4 C4 C5 C6 0.0 2_655 . . . ? 
O2 C4 C5 C6 180.000(1) . . . . ? 
N1 C4 C5 C6 0.0 . . . . ? 
C4 C4 C5 N1 0.0 2_655 . . . ? 
O2 C4 C5 N1 180.000(1) . . . . ? 
C5 N1 C6 C6 180.0 . . . 2_655 ? 
C5 N1 C6 C6 0.0 2_655 . . 2_655 ? 
C4 N1 C6 C5 0.0 . . . . ? 
C6 N1 C6 C5 180.0 2_655 . . . ? 
C5 N1 C6 C5 180.0 2_655 . . . ? 
N1 C5 C6 C6 0.0 . . . 2_655 ? 
C4 C5 C6 C6 0.0 . . . 2_655 ? 
C4 C5 C6 N1 0.0 . . . . ? 
 
_diffrn_measured_fraction_theta_max    0.990 
_diffrn_reflns_theta_full              27.53 
_diffrn_measured_fraction_theta_full   0.990 
_refine_diff_density_max    0.620 
_refine_diff_density_min   -0.446 
_refine_diff_density_rms    0.098 
